# Supplementary material
Source: PubMed Central journal article supplement (PMC9518742)

## Harper et al., Supplemental Data

### Supplemental Figure Legends

#### **Supplemental Figure 1. Effect of young vs aged collagen on OvCa cell adhesion and**

**proliferation.** (A) Adhesion to collagen. OVCAR5 and OVCAR8 cells ( $5 \times 10^5$ ) were seeded on culture plates lined with collagen isolated from young (Y, black bars) or aged (A, white bars) mice for 30 min (OVCAR5) or 45 min (OVCAR8), followed by washing and enumeration of adherent cells. There was no significant difference in adhesion ( $n=3$ ;  $p=0.42$  OVCAR5,  $p=0.087$  OVCAR8). (B) Proliferation on collagen. OVCAR5 and OVCAR8 cells ( $3 \times 10^3$ ) were seeded on culture plates lined with collagen isolated from young (Y, black bars) or aged (A, white bars) mice for 24 hours, followed by analysis of proliferation using the XTT Cell Proliferation Assay Kit. There was no significant difference in proliferation ( $n=3$ ,  $p=0.48$  OVCAR5,  $p=0.09$  OVCAR8) in either cell line.

#### **Supplemental Figure 2. Expression of MT1-MMP.** (A) OVCAR5 and OVCAR8 cell lysates

(20ug) were electrophoresed on an SDS-PAGE gel, transferred to a PVDF membrane, and probed for the presence of MT1-MMP (MMP14) with anti-MMP-14 (1:2000) and developed with a peroxidase-conjugated secondary antibody (1:4000) and ECL detection. (B)

Densitometric quantification showed an increase in MMP-14 expression in OVCAR8 as compared to OVCAR5 ( $n=3$ ,  $p=0.01$ ).

**A** **OVCAR5 Adhesion**

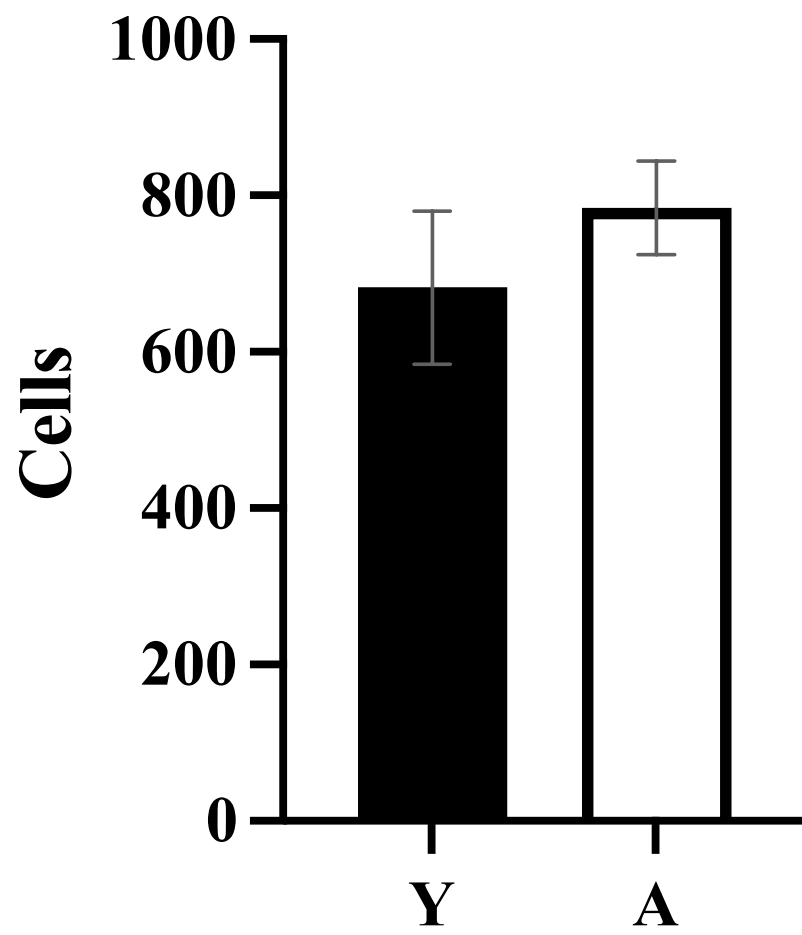

**OVCAR8 Adhesion**

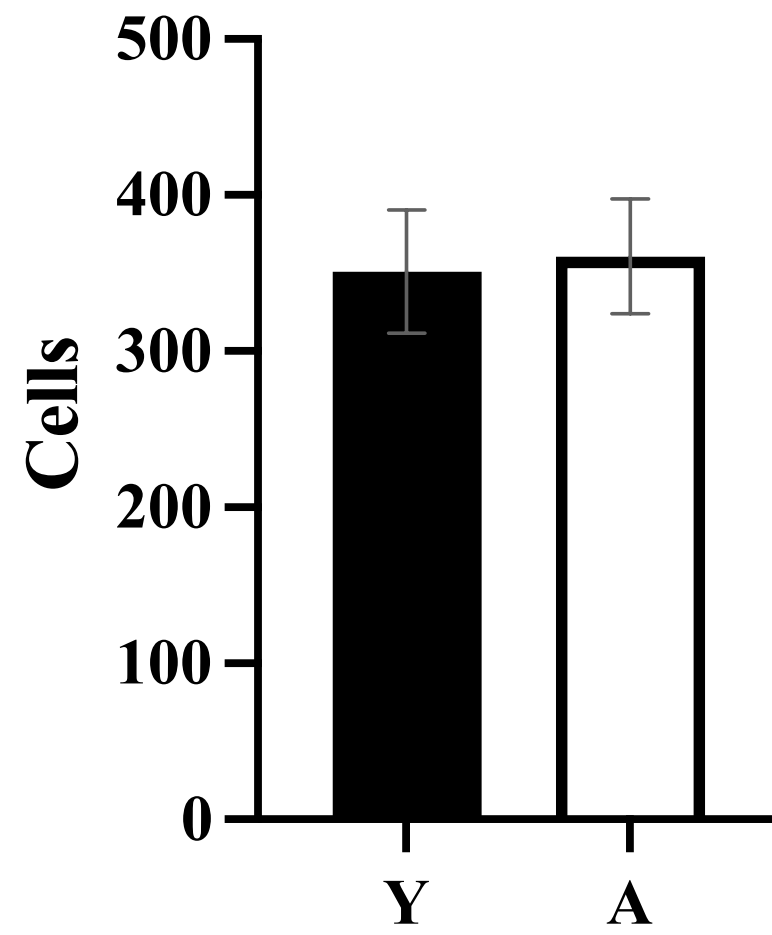

**B** **OVCAR5 Proliferation**

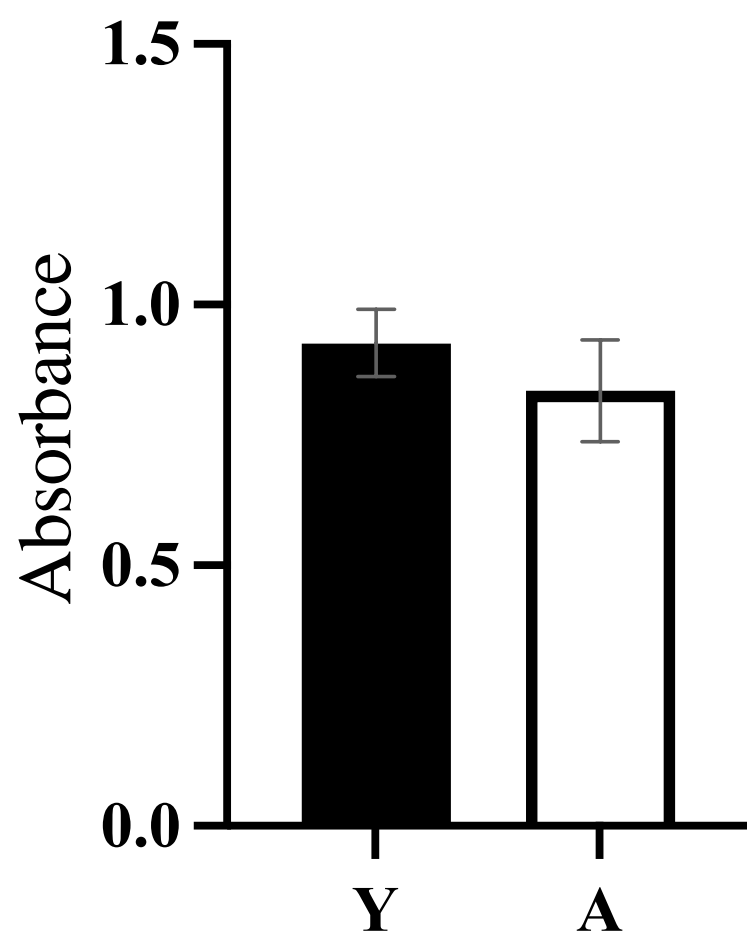

**OVCAR8 Proliferation**

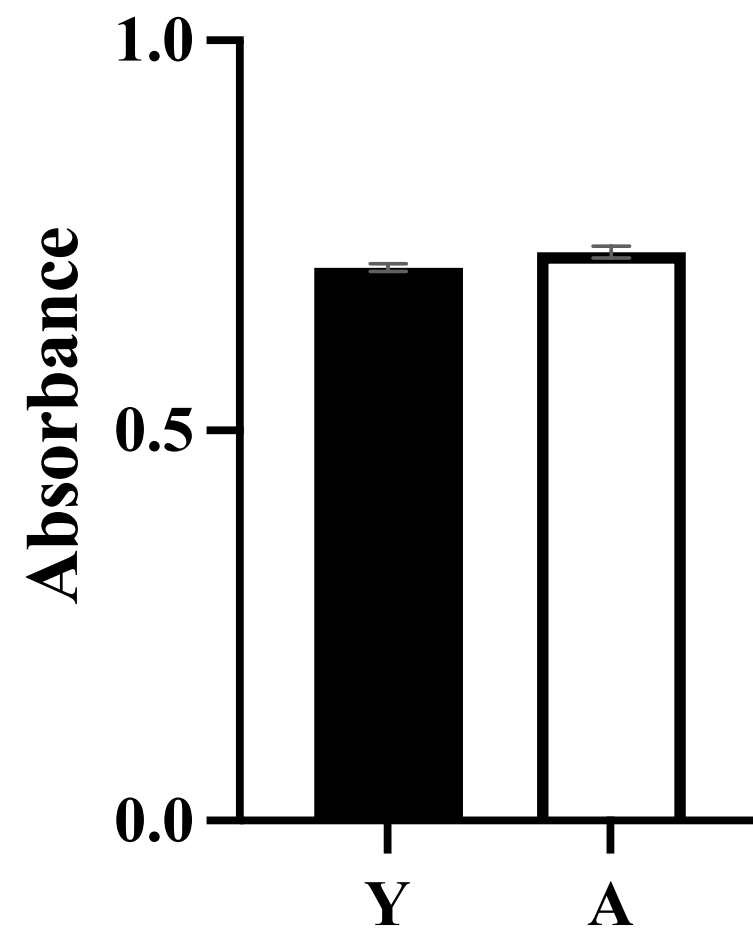

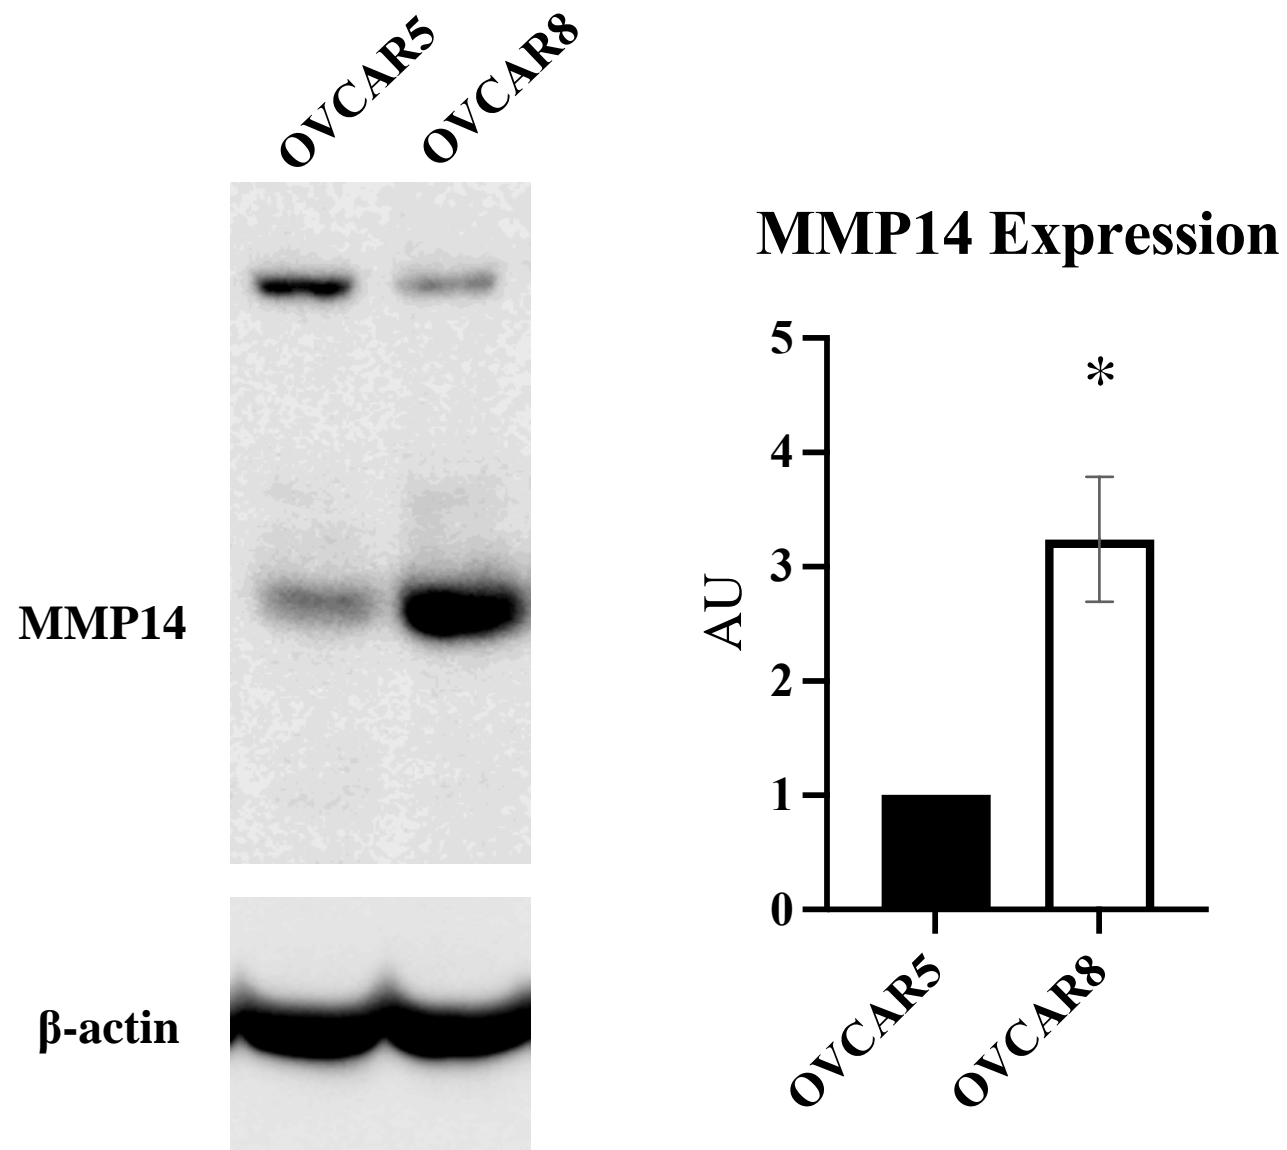

Supplement: NIHMS1793530-supplement-supinfo.pdf [file NIHMS1793530-supplement-supinfo.pdf]
